# Supplementary material for: A chromium and nitrogen co-doped NiMo-based catalyst achieving high-efficiency and durable intermittent water electrolysis
Source: Royal Society of Chemistry journal article supplement (doi:10.1039/d4ta08755k), 2025-01-01
Supplement: d4ta08755k1.pdf [file d4ta08755k1.pdf]

## **Chromium and Nitrogen co-facilitating NiMo-based catalyst achieving high-efficiency and durable intermittent water electrolysis**

Qilong Liu,<sup>a</sup> Qizhu Qian,<sup>b</sup> Huiyi Li,<sup>b</sup> Mengxiang Wang,<sup>b</sup> Jujia Zhang,<sup>a</sup> Mingliang Fang,<sup>a</sup> Wei Bai,<sup>a</sup> and Wentuan Bi <sup>a\*</sup>

<sup>a</sup> Institute of Energy, Hefei Comprehensive National Science Center (Anhui Energy Laboratory), Hefei, Anhui, 230031, P. R. China

<sup>b</sup> Hefei National Research Center for Physical Sciences at the Microscale, University of Science and Technology of China, Hefei, Anhui, 230026, P. R. China

\* Represents the corresponding author

## Materials

Nitric acid nickel(II) hexahydrate ( $\text{Ni}(\text{NO}_3)_2 \cdot 6\text{H}_2\text{O}$ , AR,  $\geq 98.0\%$ ), ammonium molybdate tetrahydrate ( $(\text{NH}_4)_6\text{Mo}_7\text{O}_{24} \cdot 4\text{H}_2\text{O}$ , AR,  $\geq 99.0\%$ ), chromium(III) chloride hexahydrate ( $\text{CrCl}_3 \cdot 6\text{H}_2\text{O}$ , AR,  $\geq 99.0\%$ ), potassium hydroxide (KOH), urea ( $\text{CO}(\text{NH}_2)_2$ ), and hydrochloric acid (HCl, AR, 36.0%–38.0%) were purchased from Sinopharm Chemical Reagent Co., Ltd. All chemical reagents were used without any further purification. The distilled water used in all experiments was purified by a Millipore system ( $18.25 \text{ M}\Omega \cdot \text{cm}$ ).

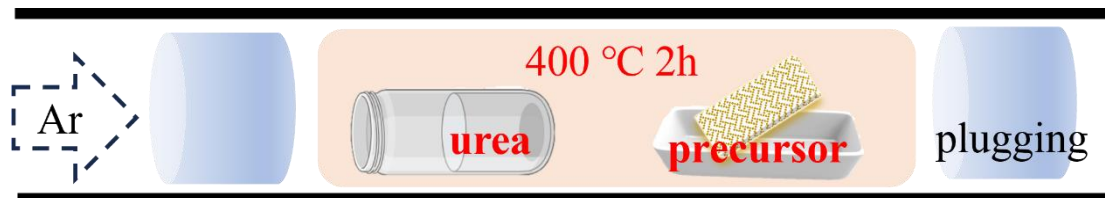

Figure S 1 Diagram of nitriding treatment.

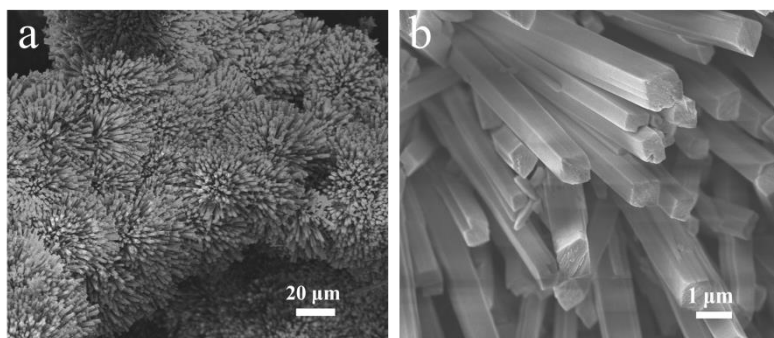

Figure S 2 (a) and (b) SEM images of NiMo/NF.

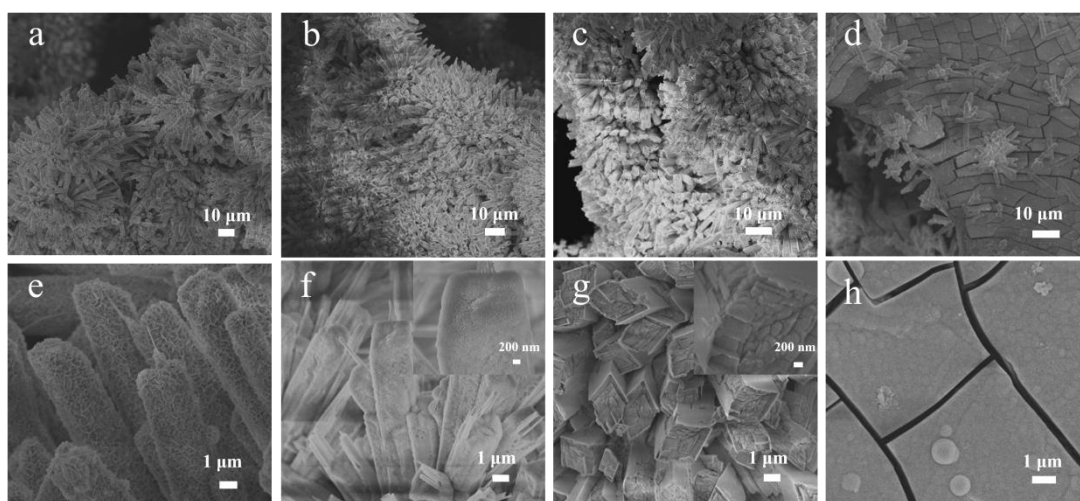

Figure S 3 SEM images of (a) and (e) NiMoCr(1)/NF; (b) and (f) NiMoCr(3)/NF; (c) and (g) NiMoCr(5)/NF; (d) and (h) NiMoCr(7)/NF.

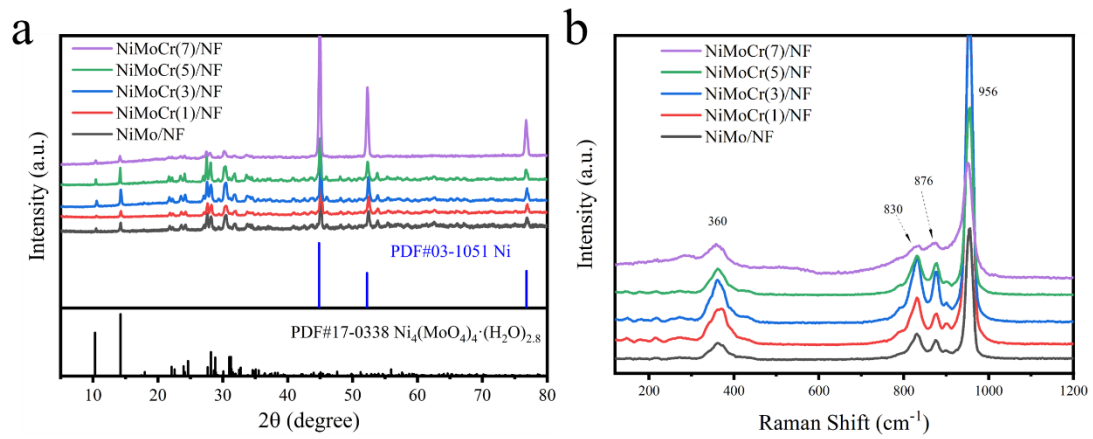

Figure S 4 (a) XRD pattern and (b) Raman spectrum of NiMo/NF, NiMoCr(1)/NF, NiMoCr(3)/NF, NiMoCr(5)/NF and NiMoCr(7)/NF.

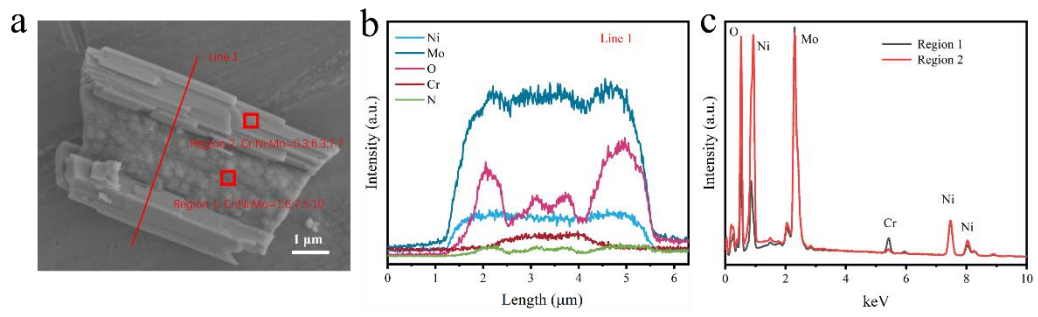

Figure S 5 (a) SEM image of NiMoCr(5)-N/NF, along with the designated positions for line and point scans; EDS data are provided in (b) for line scanning and in (c) for point scanning.

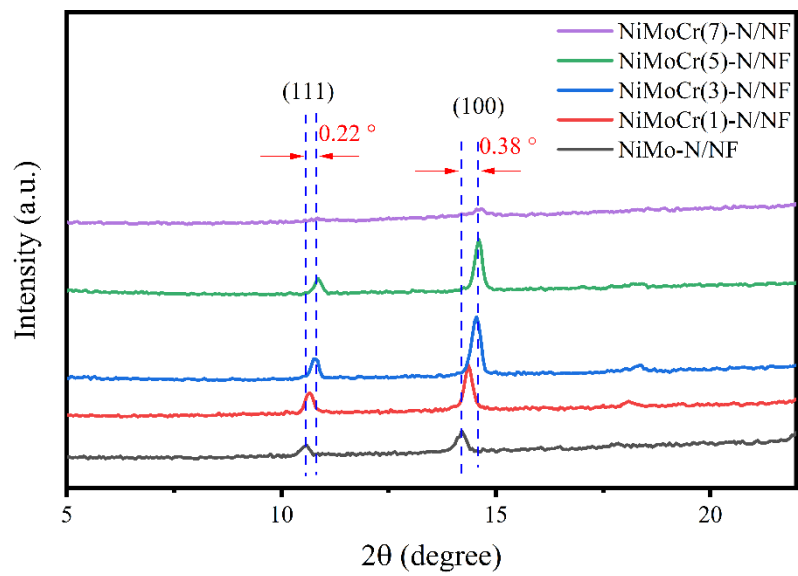

Figure S 6 The expanded XRD pattern from 5 to  $22^\circ$ .



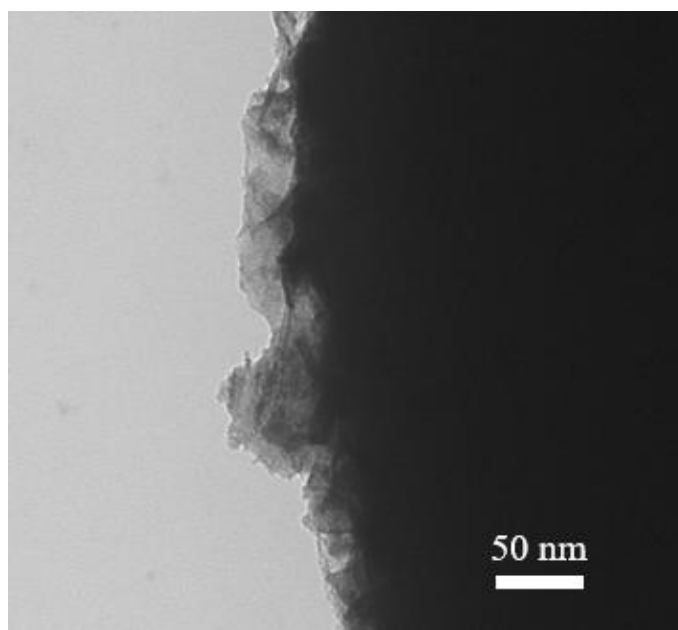

Figure S 7 TEM image of NiMoCr(3)-N/NF.

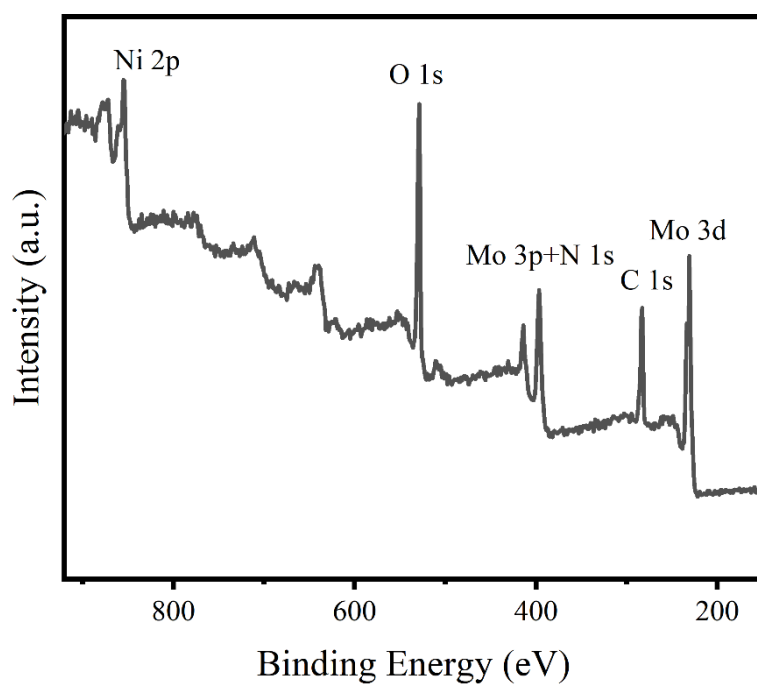

Figure S 8 The survey XPS spectra of NiMoCr(3)-N/NF.

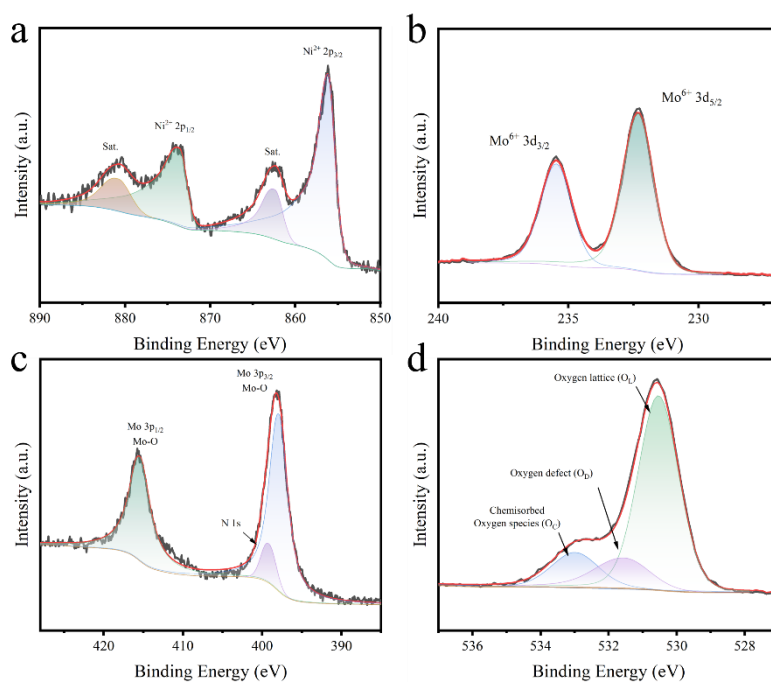

Figure S 9 High resolution XPS spectrum of NiMo/NF. (a) Ni 2p; (b) Mo 3d; (c) N 1s and Mo 3p; and (d) O 1s..

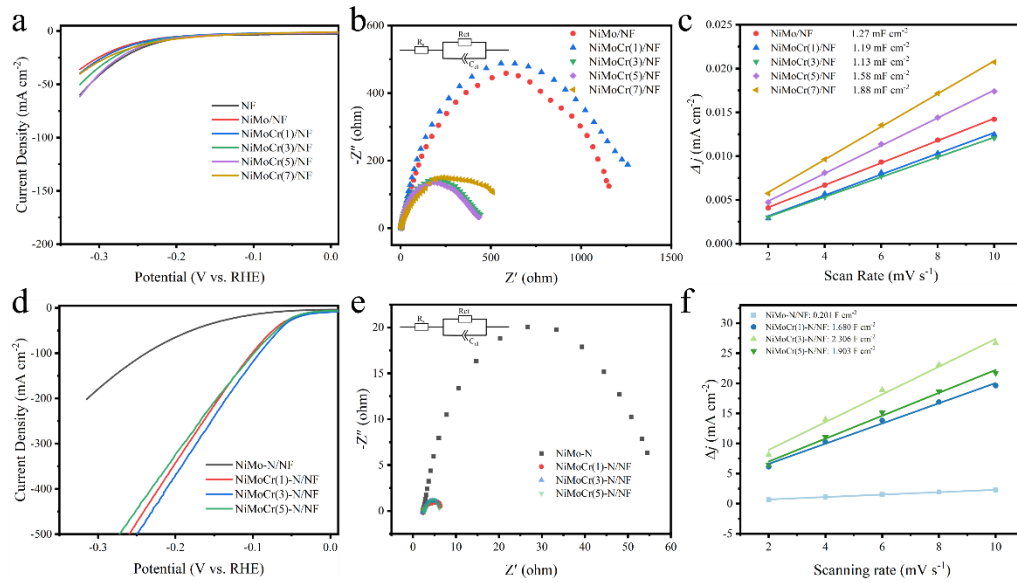

Figure S 10 (a) LSV curves; (b) EIS; (c) Cdl curves for NF, NiMo/NF, NiMoCr(1)/NF, NiMoCr(3)/NF, NiMoCr(5)/NF and NiMoCr(7)/NF. (d) LSV curves; (e) EIS; (f) Cdl curves for NiMo-N/NF, NiMoCr(1)-N/NF, NiMoCr(3)-N/NF, and NiMoCr(5)-N/NF.

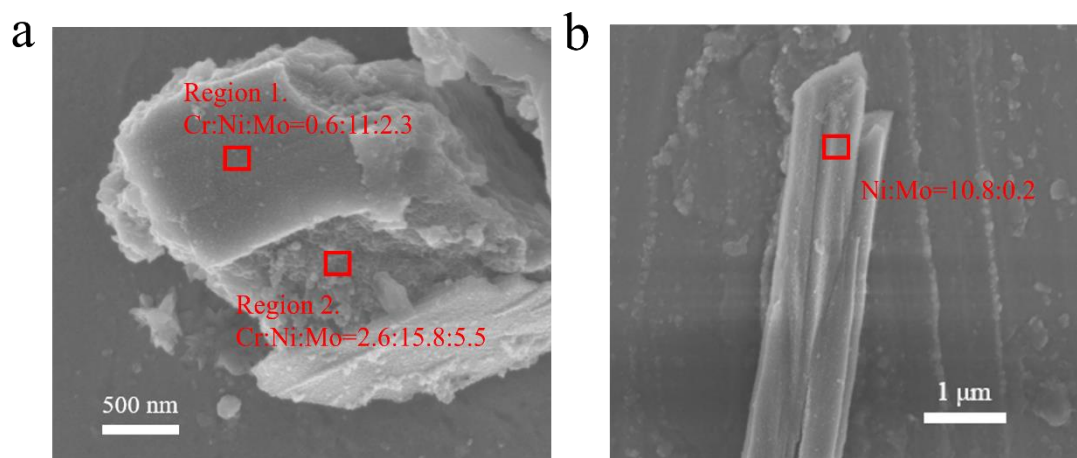

Figure S 11 SEM images of post-reaction (a) NiMoCr(5)-N/NF and (b) NiMo-N/NF electrodes and the corresponding EDS spots scanning region.

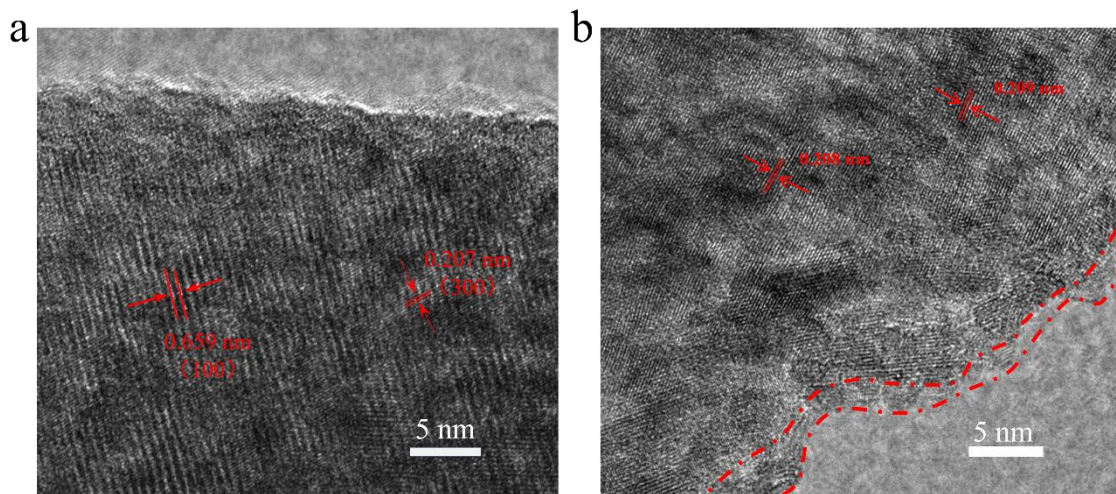

Figure S 12 the compared HRTEM images of (a) pre-reaction NiMoCr(3)-N/NF and (b) post-reaction NiMoCr(3)-N/NF.

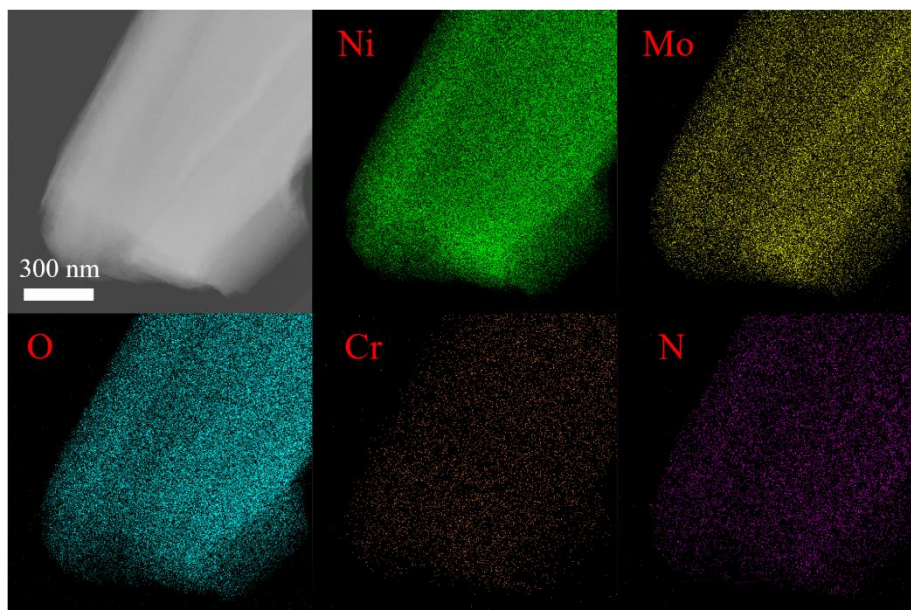

Figure S 13 The EDS mapping of the post-reaction NiMoCr(3)-N/NF.

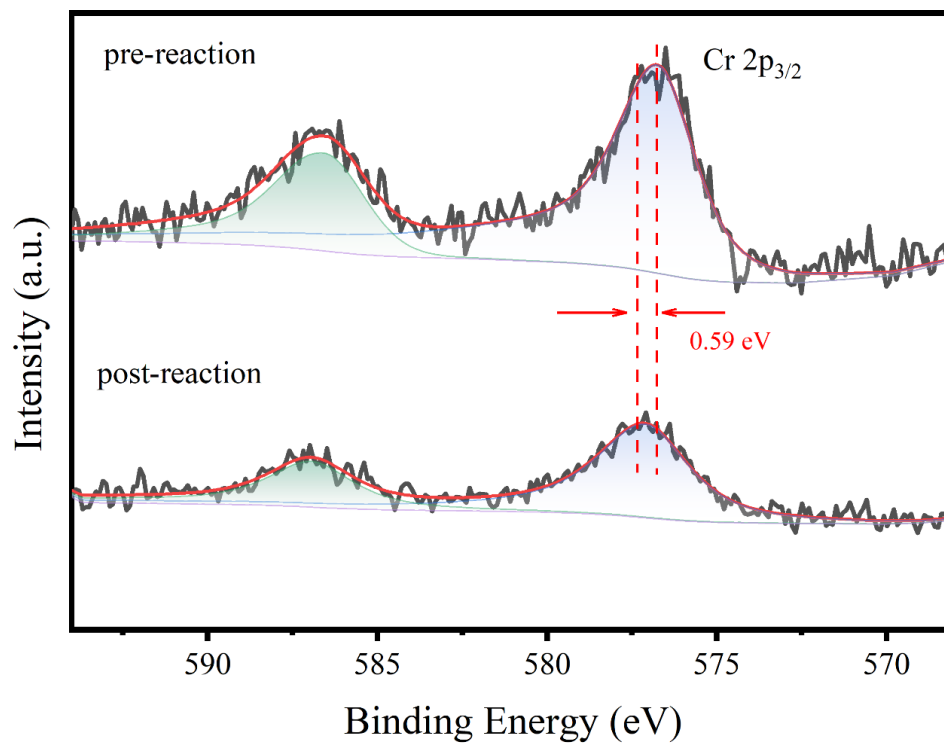

Figure S 14 High resolution XPS for Cr 2p of pre- and post-reaction of NiMoCr(5)-N/NF.



Table S 1 The HER performance of transition metal-based catalysts in 1 M KOH.

| Catalysts                                               | Overpotential<br>(mV @ mA cm <sup>-2</sup> )                           | Tafel slop<br>(mV dec <sup>-1</sup> ) | Ref.      |
|---------------------------------------------------------|------------------------------------------------------------------------|---------------------------------------|-----------|
| NiMoCr-N/NF                                             | 92 mV @ 100 mA cm <sup>-2</sup>                                        | 64                                    | This work |
| Ni <sub>2</sub> Mo <sub>3</sub> N/NF                    | 21.3 mV @ 10 mA cm <sup>-2</sup><br>123.8 mV @ 100 mA cm <sup>-2</sup> | 62                                    | 1         |
| S-NiFe <sub>2</sub> O <sub>4</sub> /NF                  | 138 mV @ 10 mA cm <sup>-2</sup>                                        | 61                                    | 2         |
| Ni <sub>3</sub> S <sub>2</sub> NA/NF                    | 200 mV @ 10 mA cm <sup>-2</sup>                                        | 107                                   | 3         |
| Ni <sub>3</sub> S <sub>2</sub> @MoS <sub>2</sub> /FeOOH | 95 mV @ 10 mA cm <sup>-2</sup>                                         | 85                                    | 4         |
| Ni-Fe-MoN NTs                                           | 55 mV @ 10 mA cm <sup>-2</sup><br>199 mV @ 100 mA cm <sup>-2</sup>     | 109                                   | 5         |
| V-Ni <sub>0.2</sub> Mo <sub>0.8</sub> N                 | 39 mV @ 10 mA cm <sup>-2</sup><br>178 mV @ 200 mA cm <sup>-2</sup>     | 37.7                                  | 6         |
| Ni@NCNT/NiMoN/NF                                        | 15 mV @ 10 mA cm <sup>-2</sup><br>156 mV @ 100 mA cm <sup>-2</sup>     | 68                                    | 7         |
| N-NiMoO <sub>4</sub> /NiS <sub>2</sub>                  | 57 mV @ 10 mA cm <sup>-2</sup>                                         | 74.2                                  | 8         |
| Ni <sub>3</sub> N-NiMoN                                 | 31 mV @ 10 mA cm <sup>-2</sup><br>210 mV @ 100 mA cm <sup>-2</sup>     | 64                                    | 9         |
| NiMo HNRs/TiM                                           | 92 mV @ 10 mA cm <sup>-2</sup><br>200 mV @ 100 mA cm <sup>-2</sup>     | 47                                    | 10        |
| Ni(PO <sub>3</sub> ) <sub>2</sub> -MoO <sub>3</sub> /NF | 86 mV @ 10 mA cm <sup>-2</sup><br>205 mV @ 100 mA cm <sup>-2</sup>     | 50.1                                  | 11        |
| NiMo NWs/Ni                                             | 30 mV @ 10 mA cm <sup>-2</sup><br>125 mV @ 100 mA cm <sup>-2</sup>     | 86                                    | 12        |
| NiCo <sub>2</sub> P <sub>x</sub>                        | 58 mV @ 10 mA cm <sup>-2</sup><br>127 mV @ 100 mA cm <sup>-2</sup>     | 34.3                                  | 13        |
| C-Ni <sub>3</sub> S <sub>2</sub> /NF                    | 89 mV @ 10 mA cm <sup>-2</sup><br>186 mV @ 100 mA cm <sup>-2</sup>     | 85                                    | 14        |
| NF@Ni/C-600                                             | 37 mV @ 10 mA cm <sup>-2</sup><br>124 mV @ 50 mA cm <sup>-2</sup>      | 57                                    | 15        |

1. S. H. Park, T. H. Jo, M. H. Lee, K. Kawashima, C. B. Mullins, H.-K. Lim and D. H. Youn, *Journal of Materials Chemistry A*, 2021, **9**, 4945-4951.
2. J. Liu, D. Zhu, T. Ling, A. Vasileff and S.-Z. Qiao, *Nano Energy*, 2017, **40**, 264-273.
3. C. Ouyang, X. Wang, C. Wang, X. Zhang, J. Wu, Z. Ma, S. Dou and S. Wang, *Electrochimica Acta*, 2015, **174**, 297-301.
4. M. Zheng, K. Guo, W.-J. Jiang, T. Tang, X. Wang, P. Zhou, J. Du, Y. Zhao, C. Xu and J.-S. Hu, *Applied Catalysis B: Environmental*, 2019, **244**, 1004-1012.
5. C. Zhu, Z. Yin, W. Lai, Y. Sun, L. Liu, X. Zhang, Y. Chen and S.-L. Chou, *Advanced Energy Materials*, 2018, **8**, 1802327.
6. P. Zhou, X. Lv, D. Xing, F. Ma, Y. Liu, Z. Wang, P. Wang, Z. Zheng, Y. Dai and B. Huang, *Applied Catalysis B: Environmental*, 2020, **263**, 118330.
7. Y. Gong, L. Wang, H. Xiong, M. Shao, L. Xu, A. Xie, S. Zhuang, Y. Tang, X. Yang, Y. Chen and P. Wan, *Journal of Materials Chemistry A*, 2019, **7**, 13671-13678.
8. L. An, J. Feng, Y. Zhang, R. Wang, H. Liu, G.-C. Wang, F. Cheng and P. Xi, *Advanced Functional Materials*, 2019, **29**, 1805298.
9. A. Wu, Y. Xie, H. Ma, C. Tian, Y. Gu, H. Yan, X. Zhang, G. Yang and H. Fu, *Nano Energy*, 2018, **44**, 353-363.
10. J. Tian, N. Cheng, Q. Liu, X. Sun, Y. He and A. M. Asiri, *Journal of Materials Chemistry A*, 2015, **3**, 20056-20059.
11. K. Li, J. Ma, X. Guan, H. He, M. Wang, G. Zhang, F. Zhang, X. Fan, W. Peng and Y. Li, *Nanoscale*, 2018, **10**, 22173-22179.
12. M. Fang, W. Gao, G. Dong, Z. Xia, S. Yip, Y. Qin, Y. Qu and J. C. Ho, *Nano Energy*, 2016, **27**, 247-254.
13. R. Zhang, X. Wang, S. Yu, T. Wen, X. Zhu, F. Yang, X. Sun, X. Wang and W. Hu, *Advanced Materials*, 2017, **29**, 1605502.
14. J. Zhang, Y. Li, T. Zhu, Y. Wang, J. Cui, J. Wu, H. Xu, X. Shu, Y. Qin, H. Zheng, P. M. Ajayan, Y. Zhang and Y. Wu, *ACS Applied Materials & Interfaces*, 2018, **10**, 31330-31339.
15. H. Sun, Y. Lian, C. Yang, L. Xiong, P. Qi, Q. Mu, X. Zhao, J. Guo, Z. Deng and Y. Peng, *Energy & Environmental Science*, 2018, **11**, 2363-2371.
